# Supplementary material for: Agro-Alimentary Potential of the Neglected and Underutilized Local Endemic Plants of Crete (Greece), Rif-Mediterranean Coast of Morocco and Tunisia: Perspectives and Challenges
Source: MDPI journal article supplement (doi:10.3390/plants10091770), 2021-08-25
Supplement: s1 [file s1]

**Supplementary material S2: Hierarchically arranged percentages (%) of the maximum possible scores achieved regarding the agro-alimentary potential of the local endemic plants of Crete, Rif-Mediterranean coast of Morocco and Tunisia indicating blue cell cases (>70%), green cell cases (>55-70%), yellow cell cases (>50-55%), grey cell cases (>35-50%) and no colour cases (<35%) in combination with Level II (Sustainable exploitation feasibility) and Level III (Readiness timescale for sustainable exploitation) multifaceted evaluations (Krigas et al. 2021).**

**A. Local endemic plants of Crete (Greece)**

| Taxa                                                  | Level I | Level II | Level III        |
|-------------------------------------------------------|---------|----------|------------------|
| <i>Origanum dictamnus</i>                             | 85.71   | 91.67    | Already achieved |
| <i>Origanum microphyllum</i>                          | 80.95   | 52.78    | Medium term      |
| <i>Sideritis syriaca</i> subsp. <i>syriaca</i>        | 80.95   | 66.67    | Short term       |
| <i>Thymbra calostachya</i>                            | 71.43   | 55.56    | Short term       |
| <i>Helichrysum doerfleri</i>                          | 59.52   | 45.83    | Long term        |
| <i>Helichrysum heldreichii</i>                        | 59.52   | 61.11    | Long term        |
| <i>Calamintha cretica</i>                             | 59.52   | 69.44    | Short term       |
| <i>Allium bourgeaui</i> subsp. <i>creticum</i>        | 54.76   | 37.50    | Long term        |
| <i>Allium circinnatum</i> subsp. <i>circinnatum</i>   | 54.76   | 29.17    | Indeterminable   |
| <i>Allium dilatatum</i>                               | 54.76   | 27.78    | Indeterminable   |
| <i>Allium platensis</i>                               | 54.76   | 41.67    | Long term        |
| <i>Micromeria hispida</i>                             | 54.76   | 45.83    | Long term        |
| <i>Micromeria sphaciotica</i>                         | 54.76   | 40.28    | Long term        |
| <i>Nepeta sphaciotica</i>                             | 50.00   | 62.50    | Short term       |
| <i>Prunella cretensis</i>                             | 50.00   | 34.72    | Indeterminable   |
| <i>Teucrium cuneifolium</i>                           | 50.00   | 63.89    | Short term       |
| <i>Crocus oreocreticus</i>                            | 45.24   | 41.67    | Long term        |
| <i>Sanguisorba cretica</i>                            | 45.24   | 38.89    | Long term        |
| <i>Centaurea idaea</i>                                | 42.86   | 36.11    | Long term        |
| <i>Campanula pelviformis</i>                          | 42.86   | 43.06    | Long term        |
| <i>Petromarula pinnata</i>                            | 42.86   | 45.83    | Long term        |
| <i>Teucrium alpestre</i>                              | 42.86   | 36.11    | Long term        |
| <i>Viola fragrans</i>                                 | 40.48   | 34.72    | Indeterminable   |
| <i>Onopordum bracteatum</i> subsp. <i>creticum</i>    | 38.10   | 38.89    | Long term        |
| <i>Dianthus fruticosus</i> subsp. <i>creticus</i>     | 35.71   | 34.72    | Indeterminable   |
| <i>Dianthus fruticosus</i> subsp. <i>sitiacus</i>     | 35.71   | 30.56    | Indeterminable   |
| <i>Dianthus juniperinus</i> subsp. <i>aciphyllus</i>  | 35.71   | 33.33    | Indeterminable   |
| <i>Dianthus juniperinus</i> subsp. <i>bauhinorum</i>  | 35.71   | 51.39    | Medium term      |
| <i>Dianthus juniperinus</i> subsp. <i>heldreichii</i> | 35.71   | 33.33    | Indeterminable   |
| <i>Dianthus juniperinus</i> subsp. <i>idaeus</i>      | 35.71   | 33.33    | Indeterminable   |

|                                                         |       |       |                |
|---------------------------------------------------------|-------|-------|----------------|
| <i>Dianthus juniperinus</i> subsp. <i>juniperinus</i>   | 35.71 | 33.33 | Indeterminable |
| <i>Dianthus juniperinus</i> subsp. <i>kavusicus</i>     | 35.71 | 50.00 | Medium term    |
| <i>Dianthus juniperinus</i> subsp. <i>pulviniformis</i> | 35.71 | 33.33 | Indeterminable |
| <i>Dianthus sphacioticus</i>                            | 35.71 | 34.72 | Indeterminable |
| <i>Dianthus xylorrhizus</i>                             | 35.71 | 58.33 | Short term     |
| <i>Phlomis lanata</i>                                   | 35.71 | 51.39 | Medium term    |
| <i>Muscari spreitzenhoferi</i>                          | 33.33 | 37.50 | Long term      |
| <i>Crepis auriculifolia</i>                             | 33.33 | 58.33 | Short term     |
| <i>Crepis sibthorpiana</i>                              | 33.33 | 52.78 | Medium term    |
| <i>Hypochaeris tenuiflora</i>                           | 33.33 | 33.33 | Indeterminable |
| <i>Lactuca alpestris</i>                                | 33.33 | 29.17 | Indeterminable |
| <i>Tragopogon lassithicus</i>                           | 33.33 | 50.00 | Medium term    |
| <i>Campanula cretica</i>                                | 33.33 | 36.11 | Long term      |
| <i>Limonium chersonesum</i>                             | 33.33 | 27.78 | Indeterminable |
| <i>Chaerophyllum creticum</i>                           | 30.95 | 52.78 | Medium term    |
| <i>Scutellaria hirta</i>                                | 30.95 | 29.17 | Indeterminable |
| <i>Scutellaria sieberi</i>                              | 30.95 | 36.11 | Long term      |
| <i>Bupleurum gaudianum</i>                              | 23.81 | 51.39 | Medium term    |
| <i>Bupleurum kakiskalae</i>                             | 23.81 | 58.33 | Short term     |
| <i>Eryngium ternatum</i>                                | 23.81 | 54.17 | Medium term    |
| <i>Cirsium morinifolium</i>                             | 23.81 | 23.61 | Indeterminable |
| <i>Hieracium schmidtii</i> subsp. <i>creticum</i>       | 23.81 | 22.22 | Indeterminable |
| <i>Klasea cretica</i>                                   | 23.81 | 26.39 | Indeterminable |
| <i>Arabis cretica</i>                                   | 23.81 | 29.17 | Indeterminable |
| <i>Noccaea cretica</i>                                  | 23.81 | 34.72 | Indeterminable |
| <i>Noccaea zaffranii</i>                                | 23.81 | 41.67 | Long term      |
| <i>Campanula creutzburgii</i>                           | 23.81 | 33.33 | Indeterminable |
| <i>Campanula hierapetrae</i>                            | 23.81 | 58.33 | Short term     |
| <i>Campanula jacquinii</i>                              | 23.81 | 38.89 | Long term      |
| <i>Campanula saxatilis</i> subsp. <i>saxatilis</i>      | 23.81 | 59.72 | Short term     |
| <i>Campanula spatulata</i> subsp. <i>filicaulis</i>     | 23.81 | 23.61 | Indeterminable |
| <i>Campanula tubulosa</i>                               | 23.81 | 33.33 | Indeterminable |
| <i>Sedum eriocarpum</i> subsp. <i>spathulifolium</i>    | 23.81 | 22.22 | Indeterminable |
| <i>Lathyrus neurolobus</i>                              | 23.81 | 41.67 | Long term      |
| <i>Medicago arborea</i> subsp. <i>strasseri</i>         | 23.81 | 50.00 | Medium term    |
| <i>Ononis verae</i>                                     | 23.81 | 27.78 | Indeterminable |
| <i>Trifolium phitosianum</i>                            | 23.81 | 18.06 | Indeterminable |
| <i>Crocus sieberi</i>                                   | 23.81 | 33.33 | Indeterminable |
| <i>Galium extensum</i>                                  | 23.81 | 27.78 | Indeterminable |
| <i>Galium fruticosum</i>                                | 23.81 | 44.44 | Long term      |
| <i>Galium incanum</i> subsp. <i>creticum</i>            | 23.81 | 44.44 | Long term      |

|                                                      |       |       |                |
|------------------------------------------------------|-------|-------|----------------|
| <i>Galium incrassatum</i>                            | 23.81 | 38.89 | Long term      |
| <i>Galium incurvum</i>                               | 23.81 | 23.61 | Indeterminable |
| <i>Centranthus sieberi</i>                           | 23.81 | 44.44 | Long term      |
| <i>Scorzonera mollis</i> subsp. <i>idaea</i>         | 21.43 | 45.83 | Long term      |
| <i>Viola alba</i> subsp. <i>cretica</i>              | 19.05 | 23.61 | Indeterminable |
| <i>Geocaryum creticum</i>                            | 14.29 | 38.89 | Long term      |
| <i>Horstrissea dolinicola</i>                        | 14.29 | 45.83 | Long term      |
| <i>Arum idaeum</i>                                   | 14.29 | 29.17 | Indeterminable |
| <i>Biarum davisii</i>                                | 14.29 | 41.67 | Long term      |
| <i>Biarum tenuifolium</i> subsp. <i>idomenaeum</i>   | 14.29 | 18.06 | Indeterminable |
| <i>Vincetoxicum creticum</i>                         | 14.29 | 38.89 | Long term      |
| <i>Bellevalia brevipedicellata</i>                   | 14.29 | 62.50 | Short term     |
| <i>Bellevalia juliana</i>                            | 14.29 | 44.44 | Long term      |
| <i>Bellevalia sitiaca</i>                            | 14.29 | 38.89 | Long term      |
| <i>Ornithogalum dictaeum</i> subsp. <i>dictaeum</i>  | 14.29 | 33.33 | Indeterminable |
| <i>Ornithogalum insulare</i>                         | 14.29 | 22.22 | Indeterminable |
| <i>Prospero battagliae</i>                           | 14.29 | 15.28 | Indeterminable |
| <i>Prospero depressum</i>                            | 14.29 | 31.94 | Indeterminable |
| <i>Prospero hierapytnense</i>                        | 14.29 | 22.22 | Indeterminable |
| <i>Prospero idaeum</i>                               | 14.29 | 31.94 | Indeterminable |
| <i>Prospero rhadamanthi</i>                          | 14.29 | 38.89 | Long term      |
| <i>Prospero talosii</i>                              | 14.29 | 33.33 | Indeterminable |
| <i>Scilla nana</i> subsp. <i>albescens</i>           | 14.29 | 23.61 | Indeterminable |
| <i>Scilla nana</i> subsp. <i>nana</i>                | 14.29 | 20.83 | Indeterminable |
| <i>Anthemis abrotanifolia</i>                        | 14.29 | 38.89 | Long term      |
| <i>Anthemis filicaulis</i>                           | 14.29 | 33.33 | Indeterminable |
| <i>Anthemis glaberrima</i>                           | 14.29 | 62.50 | Short term     |
| <i>Anthemis samariensis</i>                          | 14.29 | 33.33 | Indeterminable |
| <i>Anthemis tomentella</i>                           | 14.29 | 33.33 | Indeterminable |
| <i>Carlina diae</i>                                  | 14.29 | 58.33 | Short term     |
| <i>Centaurea argentea</i> subsp. <i>chionantha</i>   | 14.29 | 45.83 | Long term      |
| <i>Centaurea argentea</i> subsp. <i>macrothysana</i> | 14.29 | 33.33 | Indeterminable |
| <i>Centaurea baldaccii</i>                           | 14.29 | 36.11 | Long term      |
| <i>Centaurea lancifolia</i>                          | 14.29 | 52.78 | Medium term    |
| <i>Centaurea poculatoris</i>                         | 14.29 | 61.11 | Short term     |
| <i>Centaurea redempta</i> subsp. <i>redempta</i>     | 14.29 | 33.33 | Indeterminable |
| <i>Filago wagenitziana</i>                           | 14.29 | 29.17 | Indeterminable |
| <i>Inula candida</i> subsp. <i>decalvans</i>         | 14.29 | 44.44 | Long term      |
| <i>Phagnalon pygmaeum</i>                            | 14.29 | 27.78 | Indeterminable |
| <i>Senecio fruticosus</i>                            | 14.29 | 34.72 | Indeterminable |
| <i>Stachelina petiolata</i>                          | 14.29 | 54.17 | Medium term    |

|                                                          |       |       |                |
|----------------------------------------------------------|-------|-------|----------------|
| <i>Alkanna sieberi</i>                                   | 14.29 | 37.50 | Long term      |
| <i>Anchusa cespitosa</i>                                 | 14.29 | 50.00 | Medium term    |
| <i>Cynoglossum sphacioticum</i>                          | 14.29 | 40.28 | Long term      |
| <i>Myosotis solange</i>                                  | 14.29 | 40.28 | Long term      |
| <i>Alyssum fragillimum</i>                               | 14.29 | 44.44 | Long term      |
| <i>Alyssum idaeum</i>                                    | 14.29 | 51.39 | Medium term    |
| <i>Alyssum lassiticum</i>                                | 14.29 | 38.89 | Long term      |
| <i>Alyssum sphacioticum</i>                              | 14.29 | 50.00 | Medium term    |
| <i>Draba cretica</i>                                     | 14.29 | 36.11 | Long term      |
| <i>Erysimum creticum</i>                                 | 14.29 | 44.44 | Long term      |
| <i>Erysimum mutabile</i>                                 | 14.29 | 29.17 | Indeterminable |
| <i>Erysimum raulinii</i>                                 | 14.29 | 40.28 | Long term      |
| <i>Ricotia cretica</i>                                   | 14.29 | 34.72 | Indeterminable |
| <i>Bolanthus creutzburgii</i> subsp. <i>creutzburgii</i> | 14.29 | 27.78 | Indeterminable |
| <i>Bolanthus creutzburgii</i> subsp. <i>zaffranii</i>    | 14.29 | 44.44 | Long term      |
| <i>Bufonia stricta</i> subsp. <i>cecconiana</i>          | 14.29 | 23.61 | Indeterminable |
| <i>Cerastium brachypetalum</i> subsp. <i>doerfleri</i>   | 14.29 | 45.83 | Long term      |
| <i>Cerastium deschatresii</i>                            | 14.29 | 23.61 | Indeterminable |
| <i>Cerastium scaposum</i> subsp. <i>peninsularum</i>     | 14.29 | 26.39 | Indeterminable |
| <i>Cerastium scaposum</i> subsp. <i>scaposum</i>         | 14.29 | 26.39 | Indeterminable |
| <i>Cherleria wettsteinii</i>                             | 14.29 | 34.72 | Indeterminable |
| <i>Petrorhagia candida</i>                               | 14.29 | 37.50 | Long term      |
| <i>Petrorhagia dianthoides</i>                           | 14.29 | 47.22 | Long term      |
| <i>Silene ammophila</i> subsp. <i>ammophila</i>          | 14.29 | 52.78 | Medium term    |
| <i>Silene antri-jovis</i>                                | 14.29 | 40.28 | Long term      |
| <i>Silene flavescent</i> subsp. <i>dictaea</i>           | 14.29 | 51.39 | Medium term    |
| <i>Silene integripetala</i> subsp. <i>greuteri</i>       | 14.29 | 37.50 | Long term      |
| <i>Silene pinetorum</i> subsp. <i>pinetorum</i>          | 14.29 | 40.28 | Long term      |
| <i>Silene pinetorum</i> subsp. <i>sphaciotica</i>        | 14.29 | 40.28 | Long term      |
| <i>Silene sieberi</i>                                    | 14.29 | 36.11 | Long term      |
| <i>Silene variegata</i>                                  | 14.29 | 29.17 | Indeterminable |
| <i>Telephium imperati</i> subsp. <i>pauciflorum</i>      | 14.29 | 18.06 | Indeterminable |
| <i>Colchicum cretense</i>                                | 14.29 | 29.17 | Indeterminable |
| <i>Convolvulus argyrothamnos</i>                         | 14.29 | 59.72 | Short term     |
| <i>Cuscuta atrans</i>                                    | 14.29 | 43.06 | Long term      |
| <i>Euphorbia rechingeri</i>                              | 14.29 | 44.44 | Long term      |
| <i>Euphorbia sultan-hassei</i>                           | 14.29 | 37.50 | Long term      |
| <i>Astragalus creticus</i> subsp. <i>creticus</i>        | 14.29 | 22.22 | Indeterminable |
| <i>Astragalus creticus</i> subsp. <i>minoicus</i>        | 14.29 | 23.61 | Indeterminable |
| <i>Astragalus dolinicola</i>                             | 14.29 | 29.17 | Indeterminable |
| <i>Astragalus idaeus</i>                                 | 14.29 | 50.00 | Medium term    |

|                                                         |       |       |                |
|---------------------------------------------------------|-------|-------|----------------|
| <i>Astragalus nummularius</i> subsp. <i>nummularius</i> | 14.29 | 27.78 | Indeterminable |
| <i>Ebenus cretica</i>                                   | 14.29 | 45.83 | Long term      |
| <i>Onobrychis sphaciotica</i>                           | 14.29 | 52.78 | Medium term    |
| <i>Securigera globosa</i>                               | 14.29 | 43.06 | Long term      |
| <i>Hypericum aciferum</i>                               | 14.29 | 48.61 | Long term      |
| <i>Hypericum amblycalyx</i>                             | 14.29 | 33.33 | Indeterminable |
| <i>Hypericum empetrifolium</i> subsp. <i>tortuosum</i>  | 14.29 | 27.78 | Indeterminable |
| <i>Hypericum jovis</i>                                  | 14.29 | 56.94 | Short term     |
| <i>Hypericum kelleri</i>                                | 14.29 | 48.61 | Long term      |
| <i>Hypericum trichocaulon</i>                           | 14.29 | 29.17 | Indeterminable |
| <i>Acantholimon androsaceum</i>                         | 14.29 | 33.33 | Indeterminable |
| <i>Limonium calliopsium</i>                             | 14.29 | 47.22 | Long term      |
| <i>Limonium chrisianum</i>                              | 14.29 | 27.78 | Indeterminable |
| <i>Limonium cornarianum</i>                             | 14.29 | 47.22 | Long term      |
| <i>Limonium creticum</i>                                | 14.29 | 52.78 | Medium term    |
| <i>Limonium elaphonisicum</i>                           | 14.29 | 50.00 | Medium term    |
| <i>Limonium grabusae</i>                                | 14.29 | 27.78 | Indeterminable |
| <i>Limonium hierapetrae</i>                             | 14.29 | 33.33 | Indeterminable |
| <i>Limonium minoicum</i>                                | 14.29 | 27.78 | Indeterminable |
| <i>Limonium recticaule</i>                              | 14.29 | 27.78 | Indeterminable |
| <i>Limonium sougiae</i>                                 | 14.29 | 29.17 | Indeterminable |
| <i>Limonium xerocamposicum</i>                          | 14.29 | 27.78 | Indeterminable |
| <i>Adonis cretica</i>                                   | 14.29 | 22.22 | Indeterminable |
| <i>Clematis elisabethae-carolae</i>                     | 14.29 | 44.44 | Long term      |
| <i>Ranunculus cupreus</i>                               | 14.29 | 38.89 | Long term      |
| <i>Ranunculus radinotrichus</i>                         | 14.29 | 34.72 | Indeterminable |
| <i>Ranunculus veronicae</i>                             | 14.29 | 41.67 | Long term      |
| <i>Cotoneaster creticus</i>                             | 14.29 | 33.33 | Indeterminable |
| <i>Asperula crassula</i>                                | 14.29 | 48.61 | Long term      |
| <i>Asperula idaea</i>                                   | 14.29 | 38.89 | Long term      |
| <i>Asperula pubescens</i>                               | 14.29 | 33.33 | Indeterminable |
| <i>Asperula rigida</i>                                  | 14.29 | 33.33 | Indeterminable |
| <i>Verbascum arcturus</i>                               | 14.29 | 47.22 | Long term      |
| <i>Verbascum spinosum</i>                               | 14.29 | 40.28 | Long term      |
| <i>Tamarix minoa</i>                                    | 14.29 | 30.56 | Indeterminable |
| <i>Ferulago thyrsiflora</i>                             | 9.52  | 37.50 | Long term      |
| <i>Gagea omalensis</i>                                  | 9.52  | 27.78 | Indeterminable |
| <i>Anacamptis papilionacea</i> subsp. <i>alibertis</i>  | 9.52  | 22.22 | Indeterminable |
| <i>Orchis sitiaca</i>                                   | 9.52  | 25.00 | Indeterminable |
| <i>Orchis spitzelii</i> subsp. <i>nitidifolia</i>       | 9.52  | 25.00 | Indeterminable |
| <i>Asplenium creticum</i>                               | 0.00  | 27.78 | Indeterminable |

|                                                          |      |       |                |
|----------------------------------------------------------|------|-------|----------------|
| <i>Carex cretica</i>                                     | 0.00 | 25.00 | Indeterminable |
| <i>Carex idaea</i>                                       | 0.00 | 19.44 | Indeterminable |
| <i>Lomelosia albocincta</i>                              | 0.00 | 38.89 | Long term      |
| <i>Lomelosia minoana</i> subsp. <i>asterusica</i>        | 0.00 | 50.00 | Medium term    |
| <i>Lomelosia minoana</i> subsp. <i>minoana</i>           | 0.00 | 40.28 | Long term      |
| <i>Lomelosia sphaciotica</i> subsp. <i>decalvans</i>     | 0.00 | 27.78 | Indeterminable |
| <i>Lomelosia sphaciotica</i> subsp. <i>sphaciotica</i>   | 0.00 | 27.78 | Indeterminable |
| <i>Corydalis uniflora</i>                                | 0.00 | 20.83 | Indeterminable |
| <i>Fritillaria messanensis</i> subsp. <i>sphaciotica</i> | 0.00 | 18.06 | Indeterminable |
| <i>Tulipa bakeri</i>                                     | 0.00 | 41.67 | Long term      |
| <i>Tulipa cretica</i>                                    | 0.00 | 41.67 | Long term      |
| <i>Tulipa doerfleri</i>                                  | 0.00 | 40.28 | Long term      |
| <i>Linum caespitosum</i>                                 | 0.00 | 27.78 | Indeterminable |
| <i>Linum doerfleri</i>                                   | 0.00 | 38.89 | Long term      |
| <i>Cephalanthera cucullata</i>                           | 0.00 | 43.06 | Long term      |
| <i>Epipactis cretica</i>                                 | 0.00 | 25.00 | Indeterminable |
| <i>Himantoglossum samariense</i>                         | 0.00 | 18.06 | Indeterminable |
| <i>Serapias cordigera</i> subsp. <i>cretica</i>          | 0.00 | 19.44 | Indeterminable |
| <i>Brachypodium sylvaticum</i> subsp. <i>creticum</i>    | 0.00 | 34.72 | Indeterminable |
| <i>Catapodium borgesii</i>                               | 0.00 | 27.78 | Indeterminable |
| <i>Dactylis glomerata</i> subsp. <i>rigida</i>           | 0.00 | 37.50 | Long term      |
| <i>Festuca polita</i> subsp. <i>cretica</i>              | 0.00 | 18.06 | Indeterminable |
| <i>Sesleria doerfleri</i>                                | 0.00 | 56.94 | Short term     |
| <i>Polygonum idaeum</i>                                  | 0.00 | 47.22 | Long term      |
| <i>Cyclamen confusum</i>                                 | 0.00 | 31.94 | Indeterminable |
| <i>Cyclamen graecum</i> subsp. <i>candicum</i>           | 0.00 | 44.44 | Long term      |
| <i>Viscum album</i> subsp. <i>creticum</i>               | 0.00 | 16.67 | Indeterminable |
| <i>Zelkova abelicea</i>                                  | 0.00 | 52.78 | Medium term    |
| <i>Chaenorhinum idaeum</i>                               | 0.00 | 34.72 | Indeterminable |

## B. Local endemic plants of Morocco (Rif-Mediterranean coast)

| Taxa                                              | Level I | Level II | Level III      |
|---------------------------------------------------|---------|----------|----------------|
| <i>Centaureum erythraea</i> subsp. <i>bifrons</i> | 71.43   | 40.28    | Long term      |
| <i>Teucrium afrom</i> subsp. <i>rubriflorum</i>   | 71.43   | 23.61    | Indeterminable |
| <i>Teucrium grosii</i>                            | 71.43   | 26.39    | Indeterminable |
| <i>Teucrium gypsophilum</i>                       | 71.43   | 30.56    | Indeterminable |

|                                                               |       |       |                |
|---------------------------------------------------------------|-------|-------|----------------|
| <i>Teucrium huotii</i>                                        | 71.43 | 25.00 | Indeterminable |
| <i>Teucrium rotundifolium</i> subsp. <i>sanguisorbifolium</i> | 71.43 | 19.44 | Indeterminable |
| <i>Teucrium chlorostachyum</i> subsp. <i>chlorostachyum</i>   | 66.67 | 30.56 | Indeterminable |
| <i>Teucrium chlorostachyum</i> subsp. <i>melillense</i>       | 66.67 | 30.56 | Indeterminable |
| <i>Teucrium rifanum</i>                                       | 66.67 | 29.17 | Indeterminable |
| <i>Salvia interrupta</i> subsp. <i>pau</i>                    | 61.90 | 25.00 | Indeterminable |
| <i>Abies marocana</i>                                         | 47.62 | 43.06 | Long term      |
| <i>Centaureum barrelieroides</i>                              | 45.24 | 22.22 | Indeterminable |
| <i>Marrubium fontianum</i>                                    | 42.86 | 22.22 | Indeterminable |
| <i>Marrubium heterocladum</i>                                 | 42.86 | 23.61 | Indeterminable |
| <i>Anthemis mauritiana</i> subsp. <i>mauritiana</i>           | 38.10 | 29.17 | Indeterminable |
| <i>Origanum elongatum</i>                                     | 38.10 | 23.61 | Indeterminable |
| <i>Stachys fontqueri</i>                                      | 38.10 | 18.06 | Indeterminable |
| <i>Vicia cedretorum</i>                                       | 38.10 | 22.22 | Indeterminable |
| <i>Cytisus grandiflorus</i> subsp. <i>haplophyllus</i>        | 33.33 | 12.50 | Indeterminable |
| <i>Cytisus striatus</i> subsp. <i>megalanthus</i>             | 33.33 | 9.72  | Indeterminable |
| <i>Genista carpetana</i> subsp. <i>nociva</i>                 | 33.33 | 23.61 | Indeterminable |
| <i>Genista osmariensis</i>                                    | 33.33 | 25.00 | Indeterminable |
| <i>Genista oxycedrina</i>                                     | 33.33 | 19.44 | Indeterminable |
| <i>Malva vidalii</i>                                          | 33.33 | 30.56 | Indeterminable |
| <i>Sonchus masquindalii</i>                                   | 33.33 | 36.11 | Long term      |
| <i>Centaurea alibeyana</i>                                    | 28.57 | 25.00 | Indeterminable |
| <i>Centaurea monticola</i> subsp. <i>orthoacantha</i>         | 28.57 | 22.22 | Indeterminable |
| <i>Centaurea oriolii-bolosii</i>                              | 28.57 | 22.22 | Indeterminable |
| <i>Centaurea xaveri</i>                                       | 28.57 | 25.00 | Indeterminable |
| <i>Ononis alopecuroides</i> subsp. <i>simulata</i>            | 28.57 | 30.56 | Indeterminable |
| <i>Ononis gines-lopezii</i>                                   | 28.57 | 13.89 | Indeterminable |
| <i>Rumex brachypodus</i>                                      | 28.57 | 18.06 | Indeterminable |
| <i>Silene abietum</i>                                         | 28.57 | 22.22 | Indeterminable |
| <i>Silene lagrangei</i>                                       | 28.57 | 25.00 | Indeterminable |
| <i>Silene rhiphaena</i>                                       | 28.57 | 30.56 | Indeterminable |
| <i>Silene vidaliana</i>                                       | 28.57 | 22.22 | Indeterminable |
| <i>Sonchus briquetianus</i>                                   | 28.57 | 22.22 | Indeterminable |
| <i>Sonchus fragilis</i>                                       | 28.57 | 25.00 | Indeterminable |
| <i>Trifolium tastetii</i>                                     | 28.57 | 15.28 | Indeterminable |
| <i>Scrophularia fontqueri</i>                                 | 26.19 | 25.00 | Indeterminable |
| <i>Scrophularia eriocalyx</i>                                 | 21.43 | 22.22 | Indeterminable |
| <i>Antirrhinum martenii</i>                                   | 19.05 | 30.56 | Indeterminable |
| <i>Arabis pubescens</i> subsp. <i>leucanthemifolia</i>        | 19.05 | 13.89 | Indeterminable |
| <i>Armeria alpinifolia</i>                                    | 19.05 | 30.56 | Indeterminable |

|                                                     |       |       |                |
|-----------------------------------------------------|-------|-------|----------------|
| <i>Convolvulus vidalii</i>                          | 19.05 | 29.17 | Indeterminable |
| <i>Eryngium caespitiferum</i>                       | 19.05 | 25.00 | Indeterminable |
| <i>Ferula bolivari</i>                              | 19.05 | 22.22 | Indeterminable |
| <i>Ferula fontqueri</i>                             | 19.05 | 13.89 | Indeterminable |
| <i>Fumaria macrosepala</i> subsp. <i>megasepala</i> | 19.05 | 27.78 | Indeterminable |
| <i>Fumaria macrosepala</i> subsp. <i>obscura</i>    | 19.05 | 27.78 | Indeterminable |
| <i>Fumaria ouezzanensis</i> subsp. <i>ramosa</i>    | 19.05 | 26.39 | Indeterminable |
| <i>Fumaria sepium</i> subsp. <i>rugosa</i>          | 19.05 | 26.39 | Indeterminable |
| <i>Hypericum andjerinum</i>                         | 19.05 | 25.00 | Indeterminable |
| <i>Iberis contracta</i> subsp. <i>rifana</i>        | 19.05 | 18.06 | Indeterminable |
| <i>Iberis grosmiuelii</i>                           | 19.05 | 22.22 | Indeterminable |
| <i>Lathyrus coerulescens</i>                        | 19.05 | 13.89 | Indeterminable |
| <i>Linum austriacum</i> subsp. <i>gomaricum</i>     | 19.05 | 22.22 | Indeterminable |
| <i>Matthiola masquindalii</i>                       | 19.05 | 18.06 | Indeterminable |
| <i>Paronychia maroccana</i>                         | 19.05 | 23.61 | Indeterminable |
| <i>Saxifraga maweana</i>                            | 19.05 | 23.61 | Indeterminable |
| <i>Saxifraga rigoi</i> subsp. <i>maroccana</i>      | 19.05 | 30.56 | Indeterminable |
| <i>Saxifraga tricrenata</i>                         | 19.05 | 31.94 | Indeterminable |
| <i>Saxifraga wernerii</i>                           | 19.05 | 33.33 | Indeterminable |
| <i>Sedum mucizonia</i> subsp. <i>abylaea</i>        | 19.05 | 18.06 | Indeterminable |
| <i>Sideritis arborescens</i> subsp. <i>maireana</i> | 19.05 | 16.67 | Indeterminable |
| <i>Sideritis romoi</i>                              | 19.05 | 16.67 | Indeterminable |
| <i>Xiphion rutherfordii</i>                         | 19.05 | 36.11 | Long term      |
| <i>Helianthemum grosii</i>                          | 14.29 | 30.56 | Indeterminable |
| <i>Leucanthemopsis longipectinata</i>               | 14.29 | 13.89 | Indeterminable |
| <i>Narcissus albimarginatus</i>                     | 14.29 | 16.67 | Indeterminable |
| <i>Rhodanthemum hosmariense</i>                     | 14.29 | 36.11 | Long term      |
| <i>Acis tingitana</i>                               | 9.52  | 31.94 | Indeterminable |
| <i>Ammiopsis daucooides</i>                         | 9.52  | 8.33  | Indeterminable |
| <i>Anthyllis vulneraria</i> subsp. <i>fatmae</i>    | 9.52  | 38.89 | Long term      |
| <i>Anthyllis vulneraria</i> subsp. <i>ajmasiana</i> | 9.52  | 30.56 | Indeterminable |
| <i>Astragalus meuselii</i>                          | 9.52  | 18.06 | Indeterminable |
| <i>Astragalus tetuanensis</i>                       | 9.52  | 26.39 | Indeterminable |
| <i>Carduus martinezii</i> subsp. <i>fontqueri</i>   | 9.52  | 22.22 | Indeterminable |
| <i>Cephalaria mauritanica</i> subsp. <i>rifana</i>  | 9.52  | 20.83 | Indeterminable |
| <i>Echium canum</i>                                 | 9.52  | 22.22 | Indeterminable |
| <i>Fumana fontqueri</i>                             | 9.52  | 16.67 | Indeterminable |
| <i>Hieracium riofrioi</i>                           | 9.52  | 22.22 | Indeterminable |
| <i>Mantisalca amberboides</i>                       | 9.52  | 8.33  | Indeterminable |
| <i>Ptilostemon abylenis</i>                         | 9.52  | 20.83 | Indeterminable |
| <i>Santolina adscensionis</i>                       | 9.52  | 16.67 | Indeterminable |



|                                                    |      |       |                |
|----------------------------------------------------|------|-------|----------------|
| <i>Bromopsis maroccana</i>                         | 0.00 | 30.56 |                |
| <i>Bromus erectus</i> subsp. <i>microchaetus</i>   | 0.00 | 38.89 | Long term      |
| <i>Festuca embergeri</i>                           | 0.00 | 8.33  | Indeterminable |
| <i>Festuca fontqueriana</i>                        | 0.00 | 12.50 | Indeterminable |
| <i>Festuca rifana</i>                              | 0.00 | 18.06 | Indeterminable |
| <i>Hemicrambe fruticulosa</i>                      | 0.00 | 29.17 | Indeterminable |
| <i>Herniaria boissieri</i> subsp. <i>maroccana</i> | 0.00 | 29.17 | Indeterminable |
| <i>Moehringia glochidisperma</i>                   | 0.00 | 25.00 | Indeterminable |
| <i>Rhodalsine senneniana</i>                       | 0.00 | 25.00 | Indeterminable |

### C. Local endemic plants of Tunisia

| <b>Taxa</b>                                              | <b>Level I</b> | <b>Level II</b> | <b>Level III</b> |
|----------------------------------------------------------|----------------|-----------------|------------------|
| <i>Marrubium aschersonii</i>                             | 76.19          | 26.39           | Indeterminable   |
| <i>Teucrium alopecurus</i>                               | 71.43          | 27.78           | Indeterminable   |
| <i>Teucrium luteum</i> subsp. <i>gabesianum</i>          | 71.43          | 25.00           | Indeterminable   |
| <i>Artemisia campestris</i> subsp. <i>cinerea</i>        | 66.67          | 50.00           | Medium term      |
| <i>Teucrium nablii</i>                                   | 47.62          | 30.56           | Indeterminable   |
| <i>Teucrium radicans</i>                                 | 47.62          | 27.78           | Indeterminable   |
| <i>Teucrium sauvagei</i>                                 | 47.62          | 22.22           | Indeterminable   |
| <i>Calendula suffruticosa</i> subsp. <i>suffruticosa</i> | 42.86          | 36.11           | Long term        |
| <i>Dianthus cintranus</i> subsp. <i>byzacenus</i>        | 42.86          | 19.44           | Indeterminable   |
| <i>Dianthus rupicola</i> subsp. <i>hermaeensis</i>       | 42.86          | 26.39           | Indeterminable   |
| <i>Galium afropusillum</i>                               | 40.48          | 27.78           | Indeterminable   |
| <i>Galium olivetorum</i>                                 | 40.48          | 23.61           | Indeterminable   |
| <i>Ferula tunetana</i>                                   | 33.33          | 22.22           | Indeterminable   |
| <i>Limonium boitardii</i>                                | 33.33          | 23.61           | Indeterminable   |
| <i>Limonium byzantium</i>                                | 33.33          | 23.61           | Indeterminable   |
| <i>Limonium cercinense</i>                               | 33.33          | 27.78           | Indeterminable   |
| <i>Limonium clupearum</i>                                | 33.33          | 27.78           | Indeterminable   |
| <i>Limonium comosum</i>                                  | 33.33          | 23.61           | Indeterminable   |
| <i>Limonium confertum</i>                                | 33.33          | 25.00           | Indeterminable   |
| <i>Limonium elfahsianum</i>                              | 33.33          | 27.78           | Indeterminable   |
| <i>Limonium formosum</i>                                 | 33.33          | 23.61           | Indeterminable   |
| <i>Limonium hipponense</i>                               | 33.33          | 23.61           | Indeterminable   |
| <i>Limonium intricatum</i>                               | 33.33          | 27.78           | Indeterminable   |
| <i>Limonium kairouanum</i>                               | 33.33          | 27.78           | Indeterminable   |
| <i>Limonium korbousense</i>                              | 33.33          | 27.78           | Indeterminable   |
| <i>Limonium lacertosum</i>                               | 33.33          | 23.61           | Indeterminable   |
| <i>Limonium menigense</i>                                | 33.33          | 27.78           | Indeterminable   |

|                                                          |       |       |                |
|----------------------------------------------------------|-------|-------|----------------|
| <i>Limonium neapolense</i>                               | 33.33 | 27.78 | Indeterminable |
| <i>Limonium oblanceolatum</i>                            | 33.33 | 23.61 | Indeterminable |
| <i>Limonium punicum</i>                                  | 33.33 | 23.61 | Indeterminable |
| <i>Limonium pyramidatum</i>                              | 33.33 | 27.78 | Indeterminable |
| <i>Limonium rubescens</i>                                | 33.33 | 23.61 | Indeterminable |
| <i>Limonium serratum</i>                                 | 33.33 | 27.78 | Indeterminable |
| <i>Limonium tacapense</i>                                | 33.33 | 23.61 | Indeterminable |
| <i>Limonium thaenicum</i>                                | 33.33 | 27.78 | Indeterminable |
| <i>Limonium tritonianum</i>                              | 33.33 | 23.61 | Indeterminable |
| <i>Limonium xerophyllum</i>                              | 33.33 | 27.78 | Indeterminable |
| <i>Limonium zembrae</i>                                  | 33.33 | 27.78 | Indeterminable |
| <i>Limonium zeugitanum</i>                               | 33.33 | 27.78 | Indeterminable |
| <i>Centaurea sicula</i> subsp. <i>kroumirensis</i>       | 30.95 | 20.83 | Indeterminable |
| <i>Clematis tunisiatica</i>                              | 30.95 | 20.83 | Indeterminable |
| <i>Crepis juvenalis</i>                                  | 30.95 | 5.56  | Indeterminable |
| <i>Lathyrus brachyodon</i>                               | 30.95 | 20.83 | Indeterminable |
| <i>Linaria aegyptiaca</i> subsp. <i>glutinosa</i>        | 30.95 | 27.78 | Indeterminable |
| <i>Linaria cossonii</i>                                  | 30.95 | 20.83 | Indeterminable |
| <i>Linaria multicaulis</i> subsp. <i>multicaulis</i>     | 30.95 | 13.89 | Indeterminable |
| <i>Linaria paradoxa</i>                                  | 30.95 | 25.00 | Indeterminable |
| <i>Linaria pseudoviscosa</i>                             | 30.95 | 27.78 | Indeterminable |
| <i>Linaria reflexa</i> subsp. <i>doumetii</i>            | 30.95 | 27.78 | Indeterminable |
| <i>Linaria virgata</i> subsp. <i>syrtica</i>             | 30.95 | 22.22 | Indeterminable |
| <i>Linaria virgata</i> subsp. <i>tunetana</i>            | 30.95 | 25.00 | Indeterminable |
| <i>Rumex tunetanus</i>                                   | 30.95 | 31.94 | Indeterminable |
| <i>Silene barrattei</i>                                  | 30.95 | 20.83 | Indeterminable |
| <i>Trifolium tunetanum</i>                               | 30.95 | 20.83 | Indeterminable |
| <i>Sideritis tunetana</i>                                | 26.19 | 22.22 | Indeterminable |
| <i>Helianthemum crassifolium</i> subsp. <i>djeniense</i> | 21.43 | 23.61 | Indeterminable |
| <i>Helianthemum virgatum</i> subsp. <i>africanum</i>     | 21.43 | 20.83 | Indeterminable |
| <i>Lomelosia robertii</i>                                | 21.43 | 27.78 | Indeterminable |
| <i>Sixalix lehoueroui</i>                                | 21.43 | 27.78 | Indeterminable |
| <i>Sixalix thysdrusiana</i>                              | 21.43 | 18.06 | Indeterminable |
| <i>Thymelaea sempervirens</i>                            | 21.43 | 22.22 | Indeterminable |
| <i>Elaeoselinum tunetanum</i>                            | 14.29 | 16.67 | Indeterminable |
| <i>Bituminaria tunetana</i>                              | 14.29 | 27.78 | Indeterminable |
| <i>Arabis tunetana</i>                                   | 11.90 | 12.50 | Indeterminable |
| <i>Astragalus asterias</i> subsp. <i>aristidis</i>       | 11.90 | 19.44 | Indeterminable |
| <i>Bellevialia dolichophylla</i>                         | 11.90 | 27.78 | Indeterminable |
| <i>Bellevialia galitensis</i>                            | 11.90 | 27.78 | Indeterminable |
| <i>Delphinium sylvaticum</i> subsp. <i>ichkeulianum</i>  | 11.90 | 27.78 | Indeterminable |

|                                                |       |       |                |
|------------------------------------------------|-------|-------|----------------|
| <i>Hyacinthoides kroumiriensis</i>             | 11.90 | 15.28 | Indeterminable |
| <i>Sporobolus tourneuxii</i>                   | 11.90 | 27.78 | Indeterminable |
| <i>Erysimum teppneri</i>                       | 4.76  | 22.22 | Indeterminable |
| <i>Anarrhinum brevifolium</i>                  | 2.38  | 11.11 | Indeterminable |
| <i>Erinacea schoenenbergeri</i>                | 2.38  | 11.11 | Indeterminable |
| <i>Festuca scholziana</i>                      | 2.38  | 22.22 | Indeterminable |
| <i>Odontites citrinus</i>                      | 2.38  | 9.72  | Indeterminable |
| <i>Oncostema maireana</i>                      | 2.38  | 18.06 | Indeterminable |
| <i>Ophrys omegaifera</i> subsp. <i>hayekii</i> | 2.38  | 25.00 | Indeterminable |
| <i>Ophrys pseudomigoutiana</i>                 | 2.38  | 13.89 | Indeterminable |
| <i>Ophrys</i> x <i>carpitana</i>               | 2.38  | 27.78 | Indeterminable |
| <i>Poa lehoueroui</i>                          | 2.38  | 16.67 | Indeterminable |
| <i>Serapias</i> x <i>debelairii</i>            | 2.38  | 23.61 | Indeterminable |
| <i>Stipa alba</i>                              | 2.38  | 27.78 | Indeterminable |
